# Supplementary material for: Shikonin suppresses colon cancer cell growth and exerts synergistic effects by regulating ADAM17 and the IL-6/STAT3 signaling pathway
Source: PubMed Central journal article supplement — Int J Oncol. 2021 Nov 1;59(6):99. doi: 10.3892/ijo.2021.5279 (PMC8577797; doi:10.3892/ijo.2021.5279), 2021-11-01

## Supplementary Materials and methods

*Cell viability assay.* After adhering to a 96-well plate for 24 h, the cells (6,000 cells per well) were treated with or without various concentrations of shikonin (DMSO as a control) for 10 h, and cell viability was determined using a Cell Counting Kit-8 (cat. no. HY-K0301; MedChemExpress) according to the manufacturer's instructions.

*Cell culture, treatment and antibodies.* NCM460 cells (cat. no. C1227) were obtained from WarnerBiotech, and authenticated via STR profiling and mycoplasmas were tested monthly. Cells were cultured in Dulbecco's modified Eagle's medium (DMEM; Nanjing KeyGen Biotech Co., Ltd.) supplemented with high glucose and fetal bovine serum (10X; Gibco; Thermo Fisher Scientific, Inc.) and penicillin/streptomycin (100X; Sigma-Aldrich; Merck KGaA). Prior to treatment, the cells were cultured for 12 h in an incubator (37°C, 5% CO<sub>2</sub>). IL-6 (25 ng/ml, 10 h of treatment) was used to detect the expression of p-EGFR, while various concentrations of shikonin (10, 15 and 20 μM, 10 h of treatment) were to determine the potential effect of shikonin on β-catenin levels. The antibodies (1:1,000 dilution) used were as follows: anti-p-EGFR (cat. no. 3777; Cell Signaling Technology, Inc.), anti-β-catenin (cat. no. 8480; Cell Signaling Technology, Inc.) and anti-EGFR (cat. no. ET1603-37; HuaBio). Western blot analysis was performed as described in Materials and methods section in the manuscript.

*Annexin V/PI assay.* Cells (5,000 cells per well) were seeded in 96-well plates for 12 h and treated with or without shikonin (10 or 20 μM, DMSO as a control) for 10 h. The following experiments were performed with Annexin V-FITC/PI cell apoptosis detection assay (cat. no. KGA108; Nanjing KeyGen Biotech Co., Ltd.) according to the manufacturer's instructions. The stained cells were imaged under a fluorescence microscope (Guangzhou Micro-shot Technology Co., Ltd.).

Figure S1. Shikonin promotes apoptosis as evidenced by the enhanced number of positively stained spots in the Annexin V/PI immunofluorescence staining assay. (A) Spots of Annexin V (green) and PI (red) imaged in HCT116 cells. (B) Spots of Annexin V (green) and PI (red) imaged in SW480 colon cancer cells. Scale bars, 50  $\mu$ m.

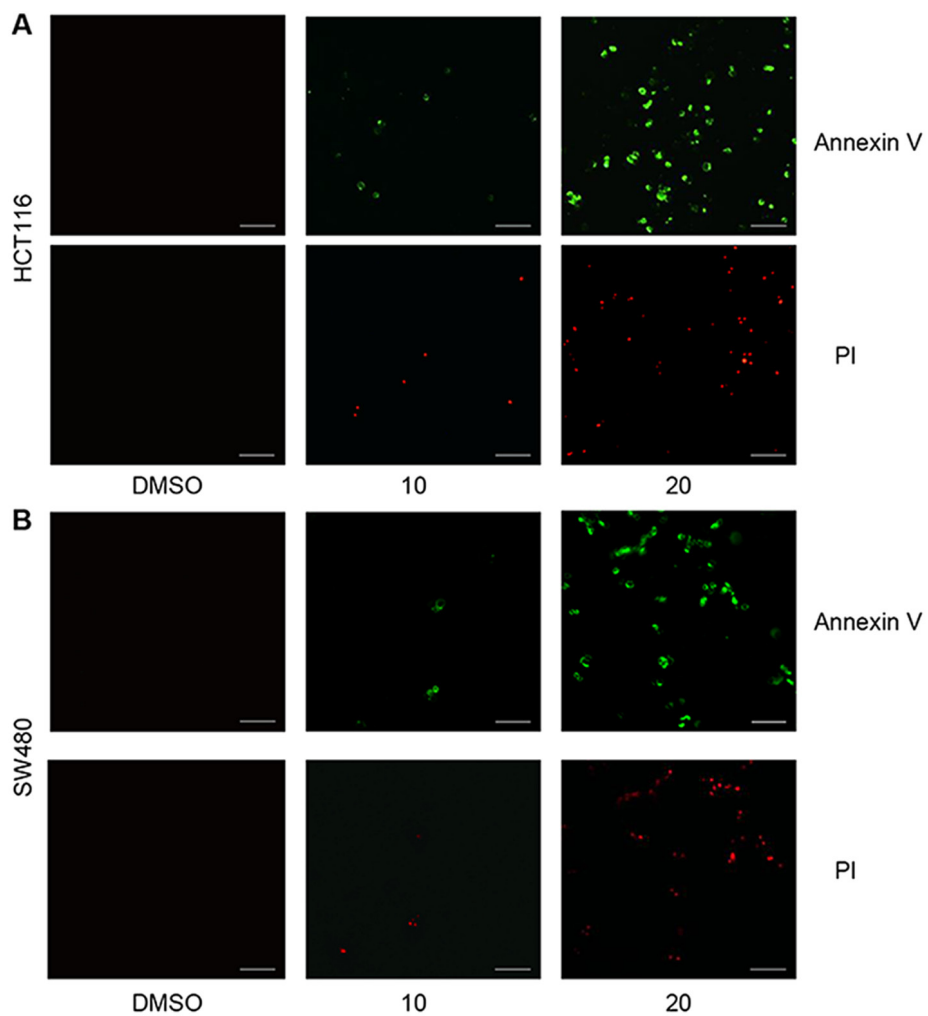

Figure S2. Treatment with 25 ng/ml IL-6 does not induce the phosphorylation of EGFR in HCT116 and SW480 cells. Quantitative data of p-EGFR were normalized to GAPDH or t-EGFR. The quantitative data of the control group were arbitrarily set as 1. All data represent the mean  $\pm$  SEM. ns, no significance. IL, interleukin; EGFR, epidermal growth factor receptor.

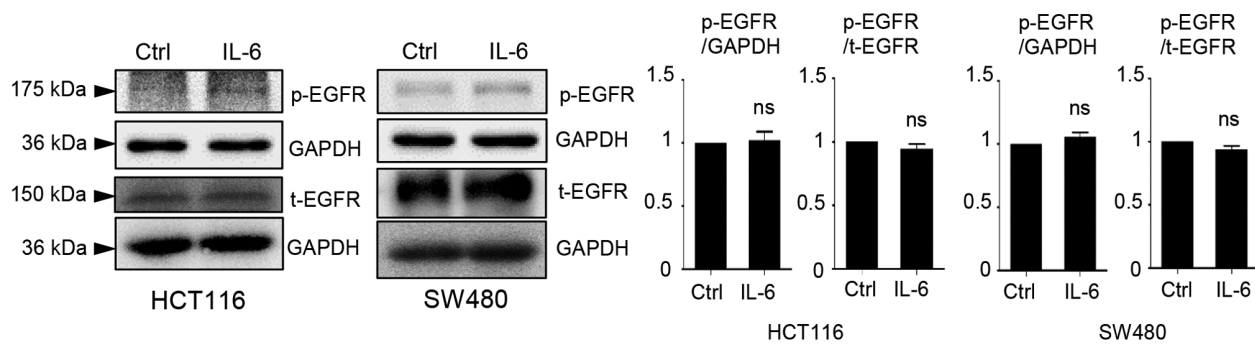

Figure S3. Shikonin does not affect the expression of  $\beta$ -catenin in the both cancer cell lines. Shikonin (10, 15 and 20  $\mu$ M) was added to the medium for 10 h. Quantitative data of  $\beta$ -catenin were normalized to GAPDH. The quantitative data of the DMSO group (0  $\mu$ M SKN) were arbitrarily set as 1. All data represent the mean  $\pm$  SEM. ns, no significance.

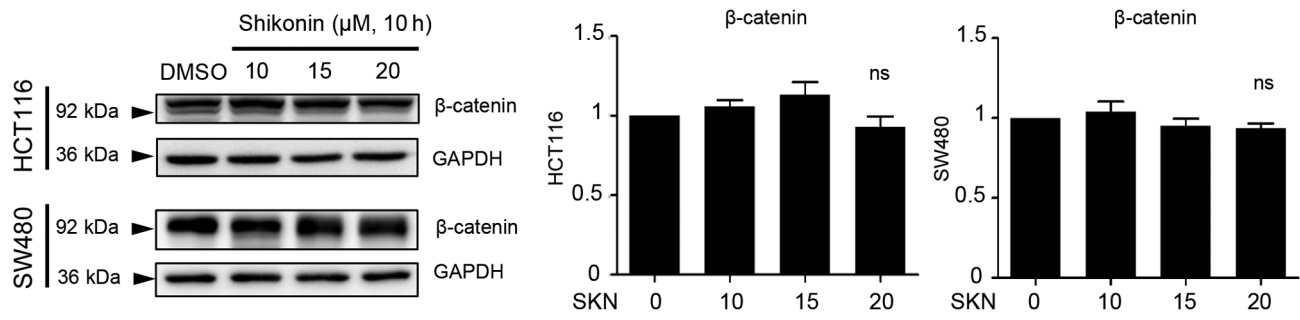

Figure S4. Effect of SKN on NCM460 cells. Cell viability of the DMSO group (0  $\mu$ M SKN) was arbitrarily set as 1. \*P<0.05 vs. DMSO group. SKN, shikonin.

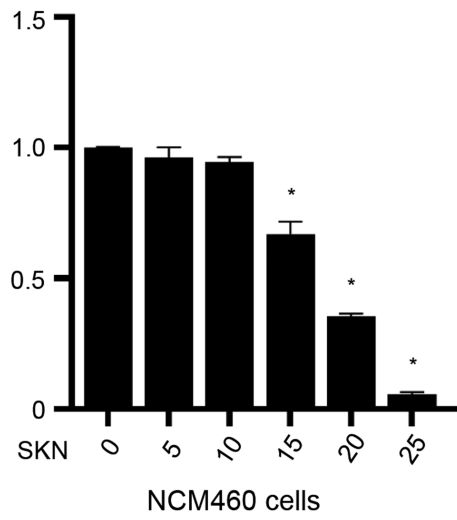

Supplement: Supplementary_Data.pdf [file Supplementary_Data.pdf]
